# Supplementary material
Source: PubMed Central journal article supplement (PMC6999757)

## Electronic Appendix A. Supplementary Material

Title: A Coordinated Microstructural and Isotopic Study of a Wark-Lovering Rim on a Vigarano CAI

Authors: Jangmi Han, Lindsay P. Keller, Ming-Chang Liu, Andrew W. Needham, Andreas T. Hertwig, Scott Messenger, Justin I. Simon

**Table EA1.** Relative sensitivity factors determined on standards with known  $^{27}\text{Al}/^{24}\text{Mg}$  for this study (errors  $2\sigma$ ).

|     | Burma Spinel | Madagascar hibonite | Pyroxene glass | Anorthite | Melilite glass |
|-----|--------------|---------------------|----------------|-----------|----------------|
| RSF | 1.37±0.01    | 1.34±0.02           | 1.25±0.01      | 1.20±0.04 | 1.00±0.01      |

**Figure EA1.** BSE images of the WL rim on the Vigarano CAI *Big Guy*. Locations of FIB sections are indicated. Abbreviations hereafter: hib = hibonite; pv = perovskite; sp = spinel; mel = melilite; an = anorthite; di = diopside; fo = forsterite.

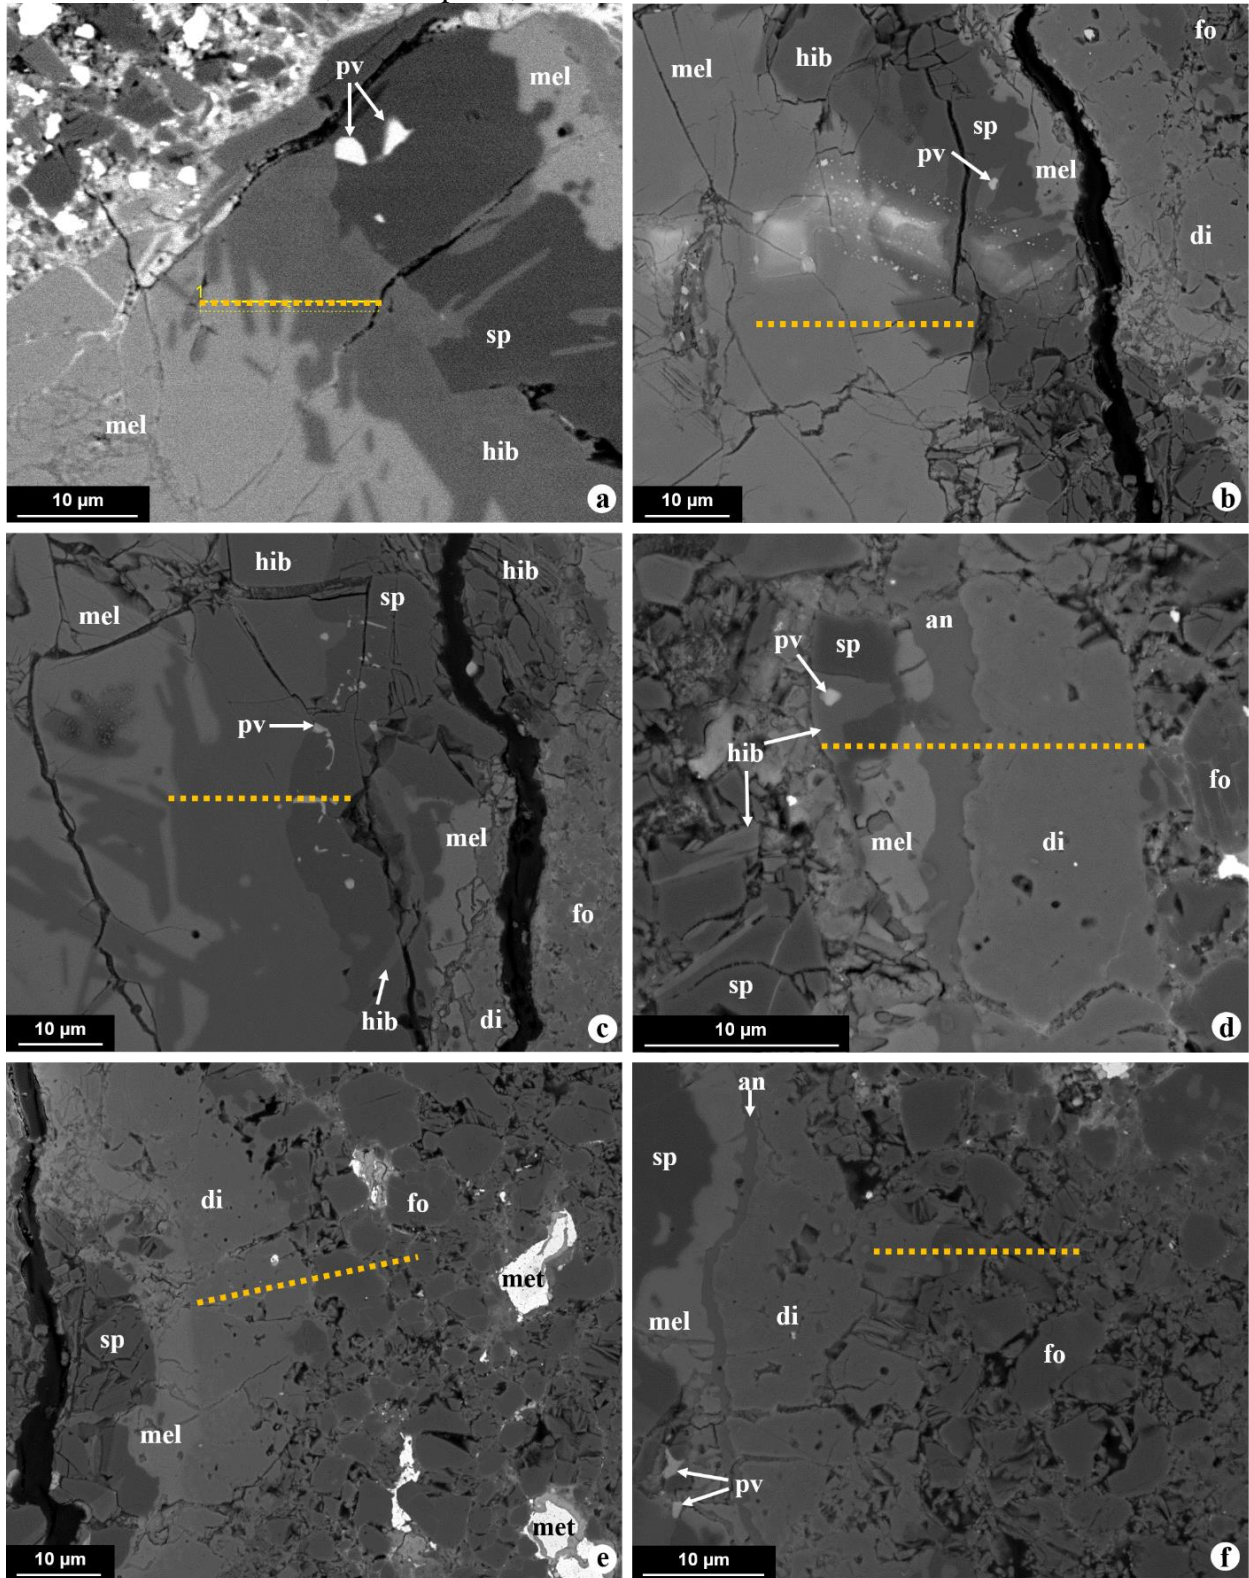

**Figure EA2.** BSE images of the WL rim on the Vigarano CAI *Big Guy*. Locations of NanoSIMS spots are indicated as red rectangles, whereas those of ims-1290 ion microprobe spots are indicated as yellow circles.

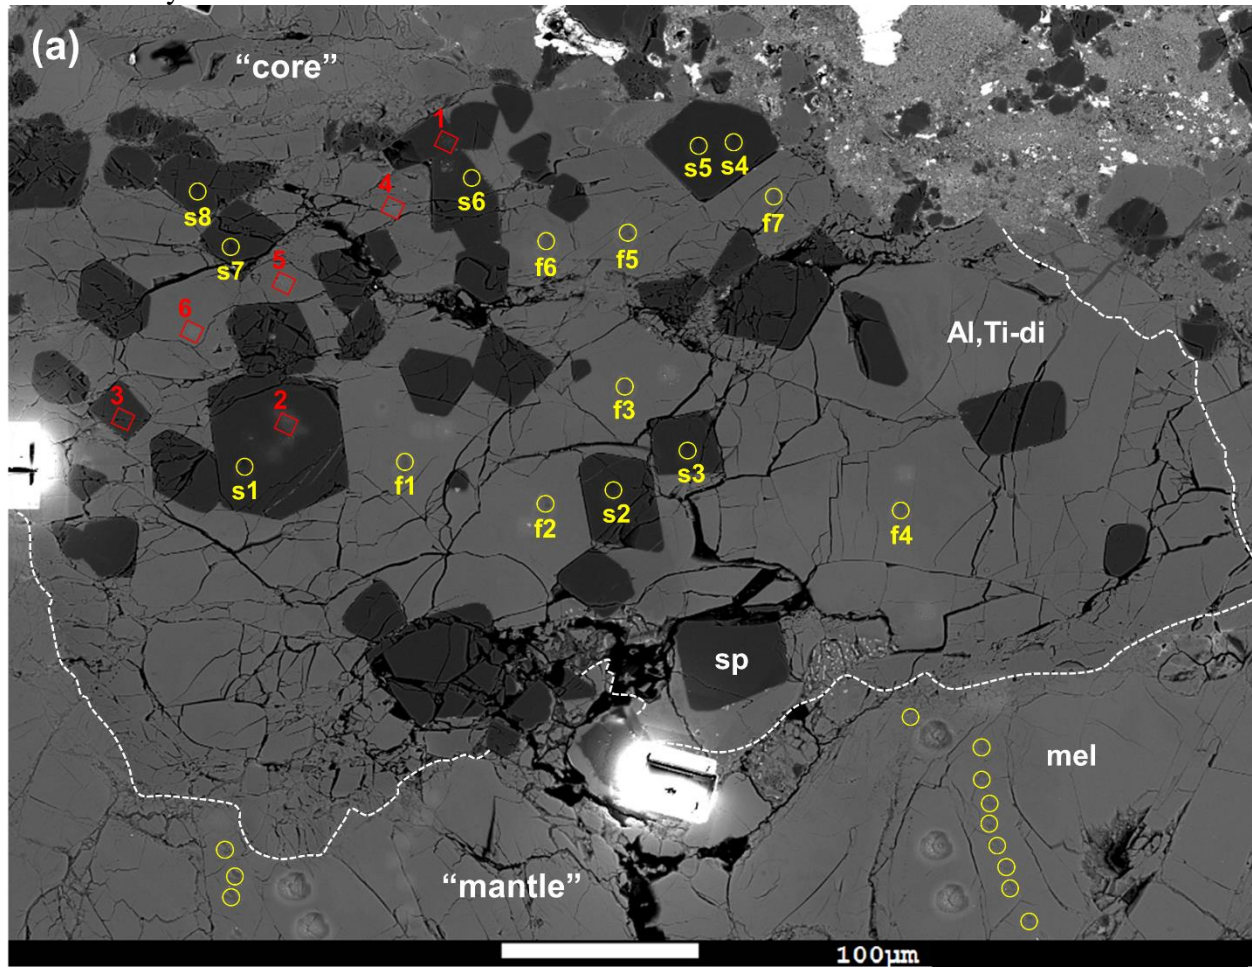



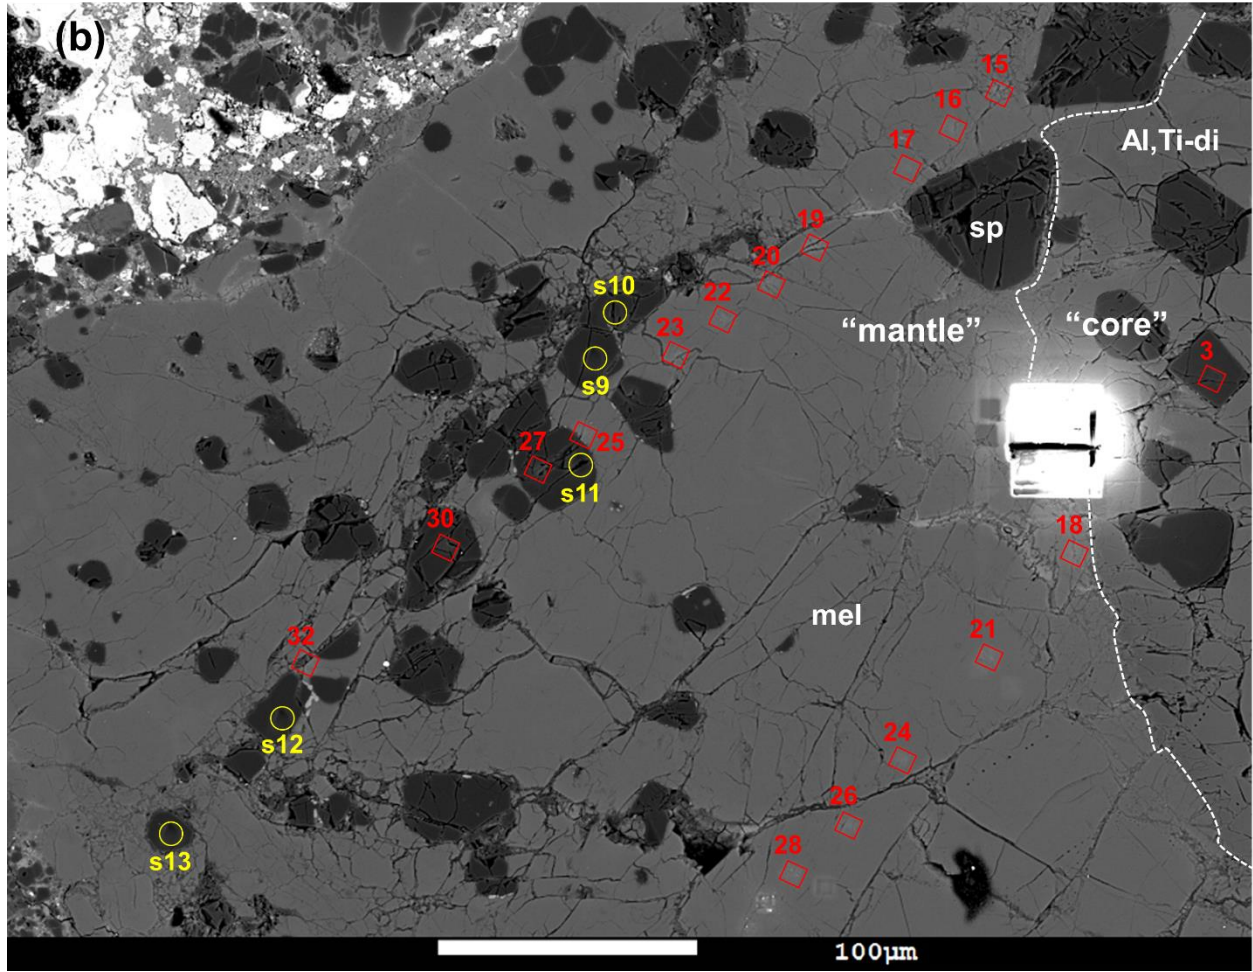

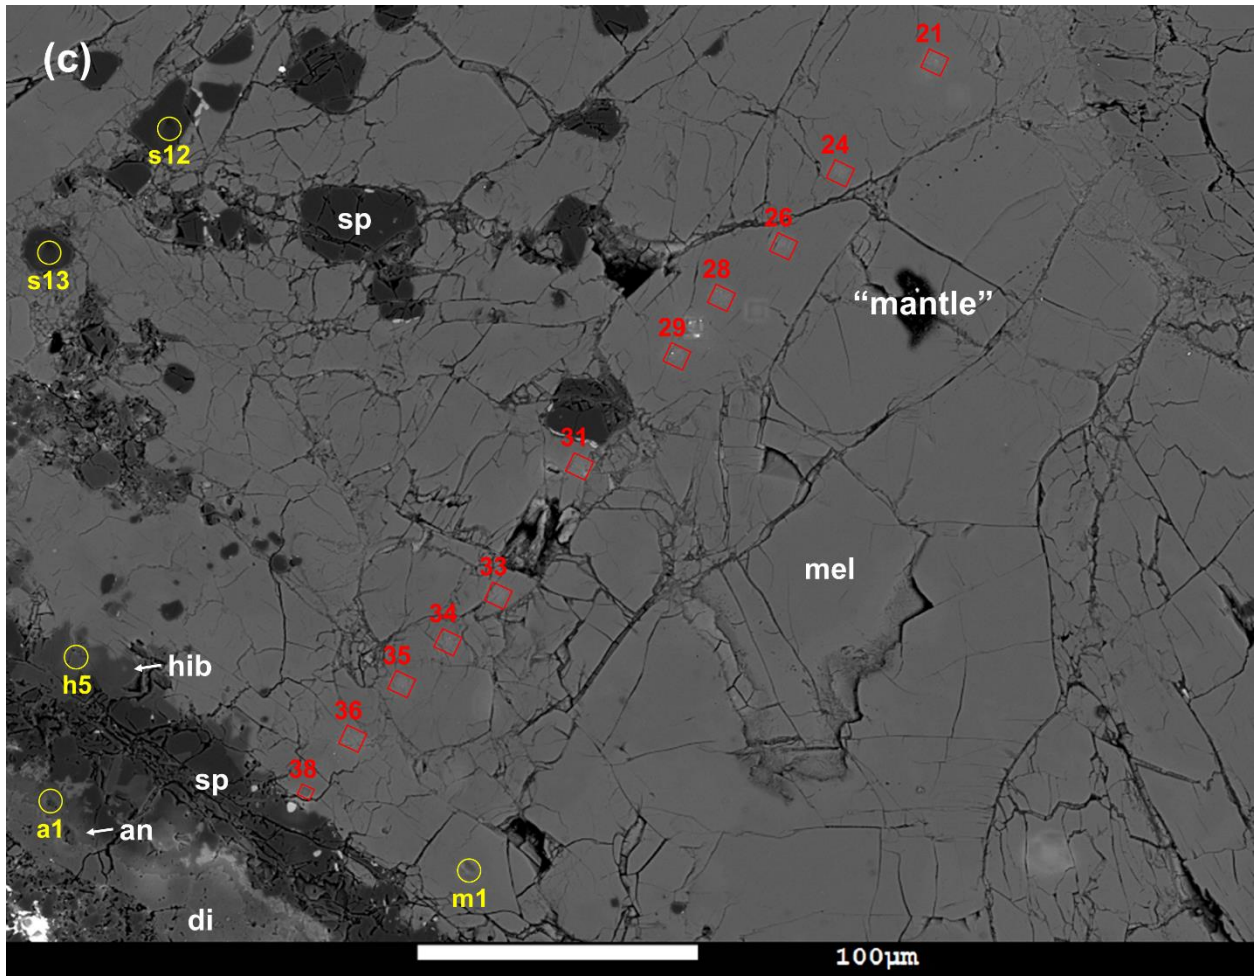

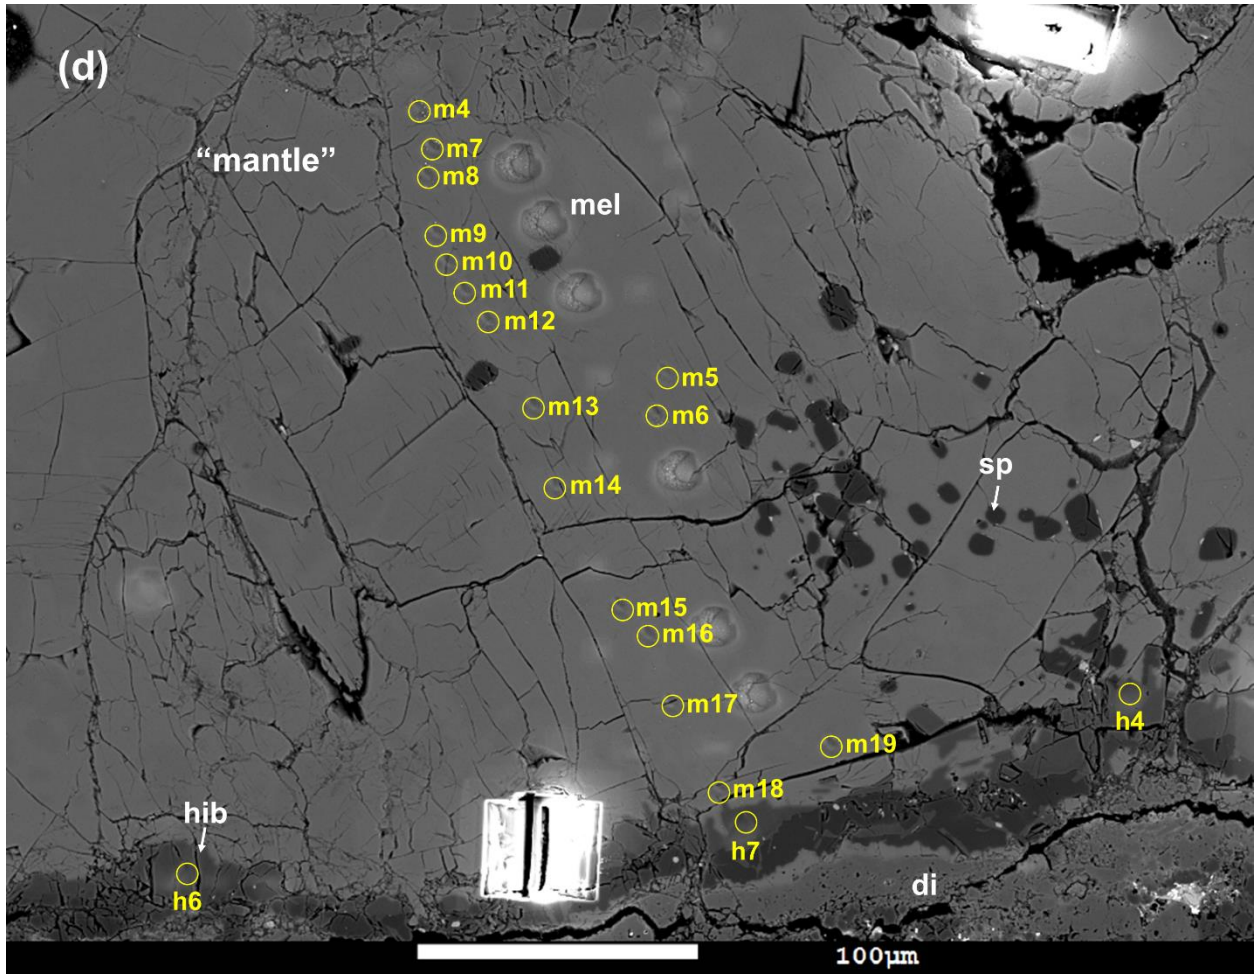



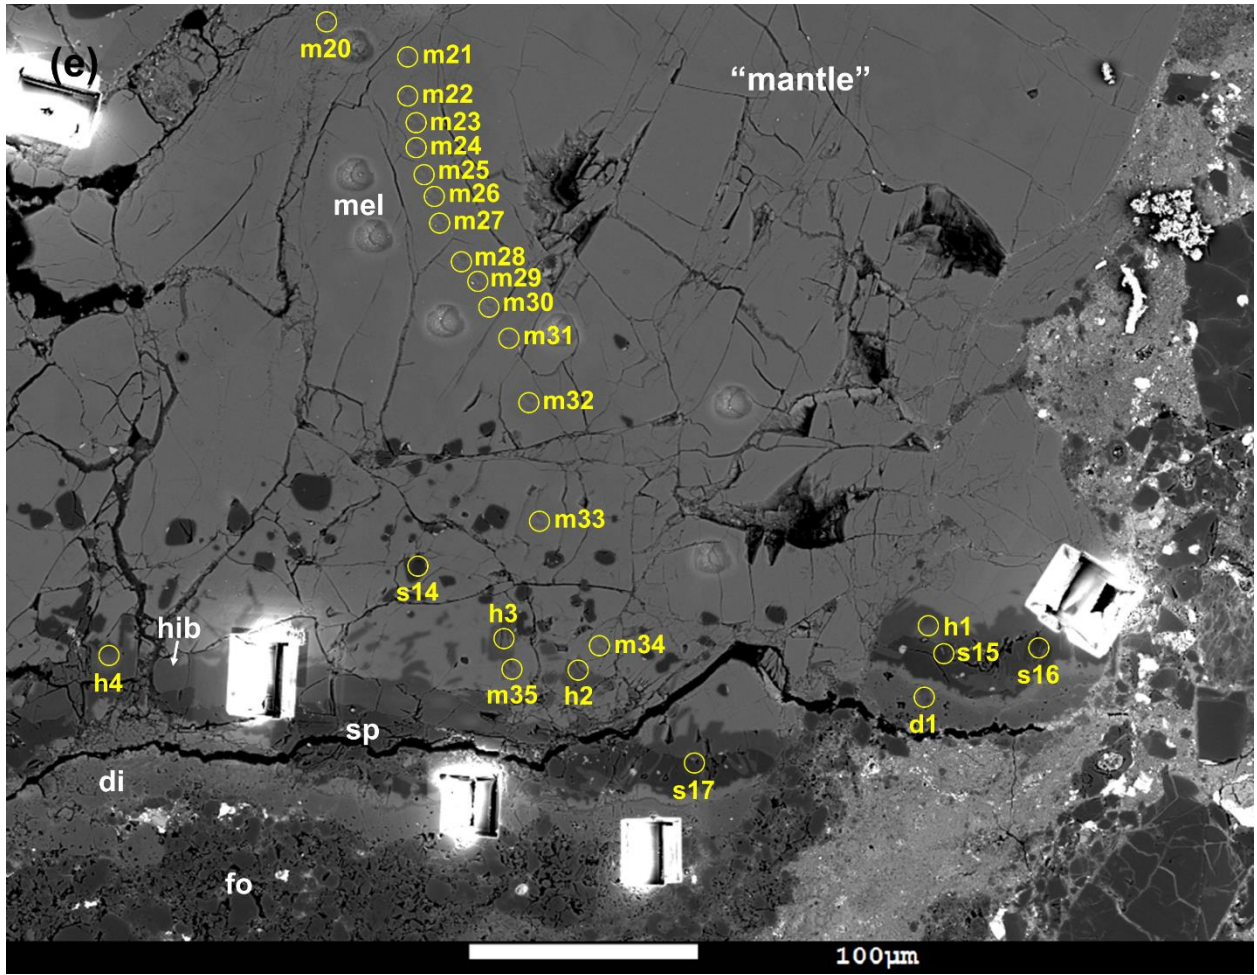

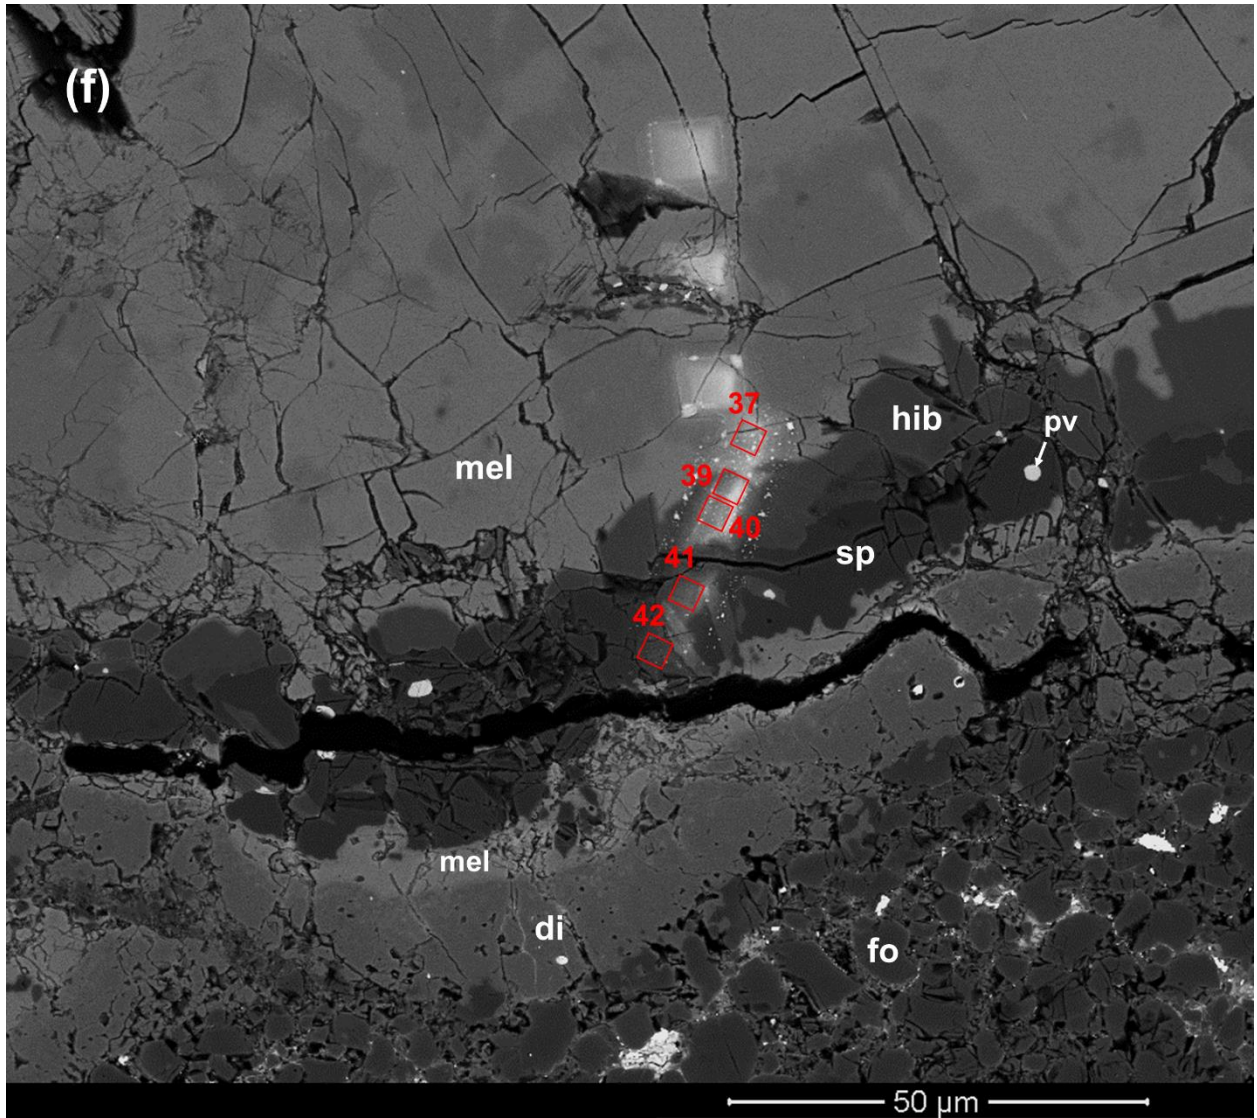



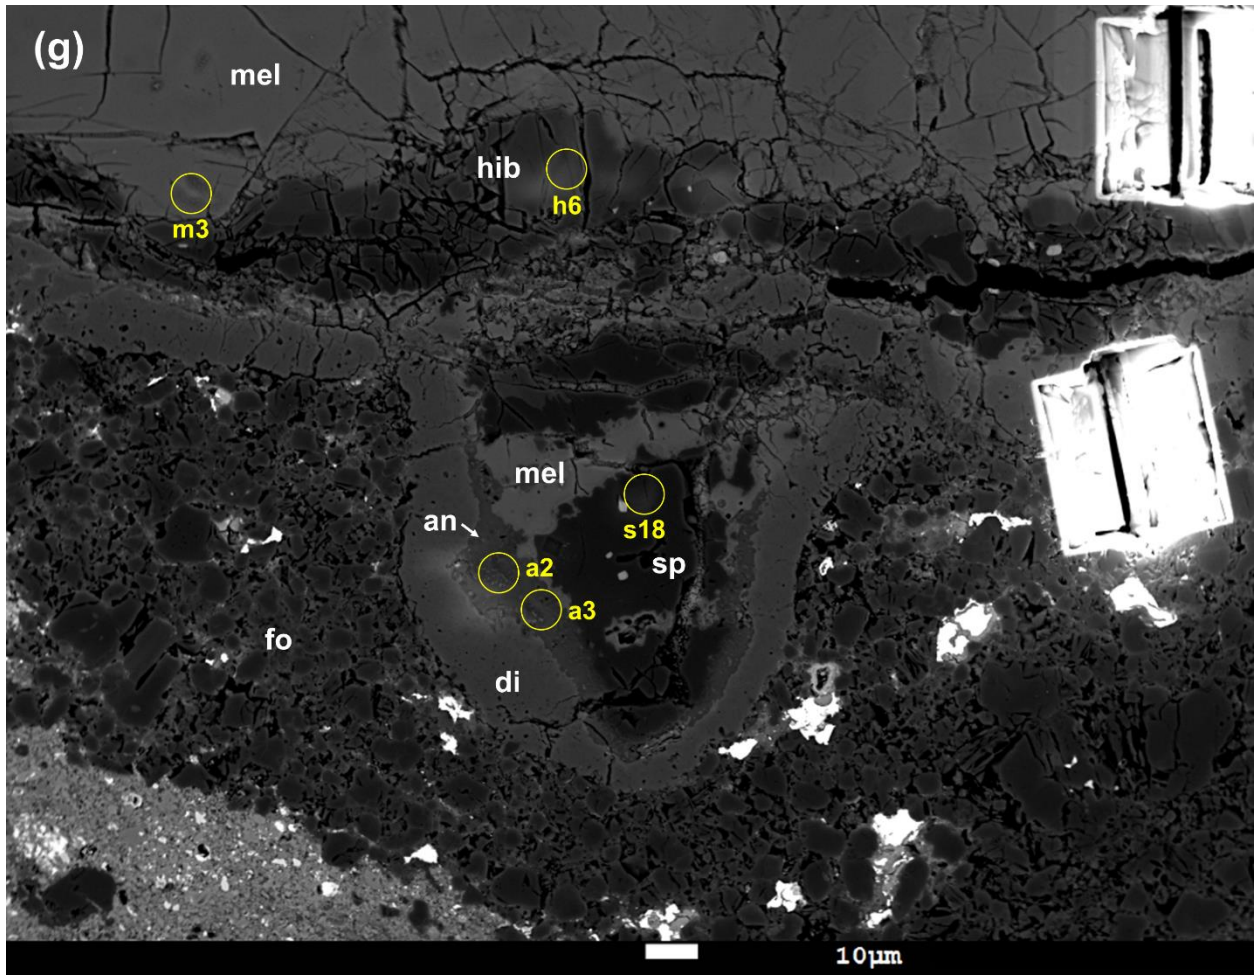

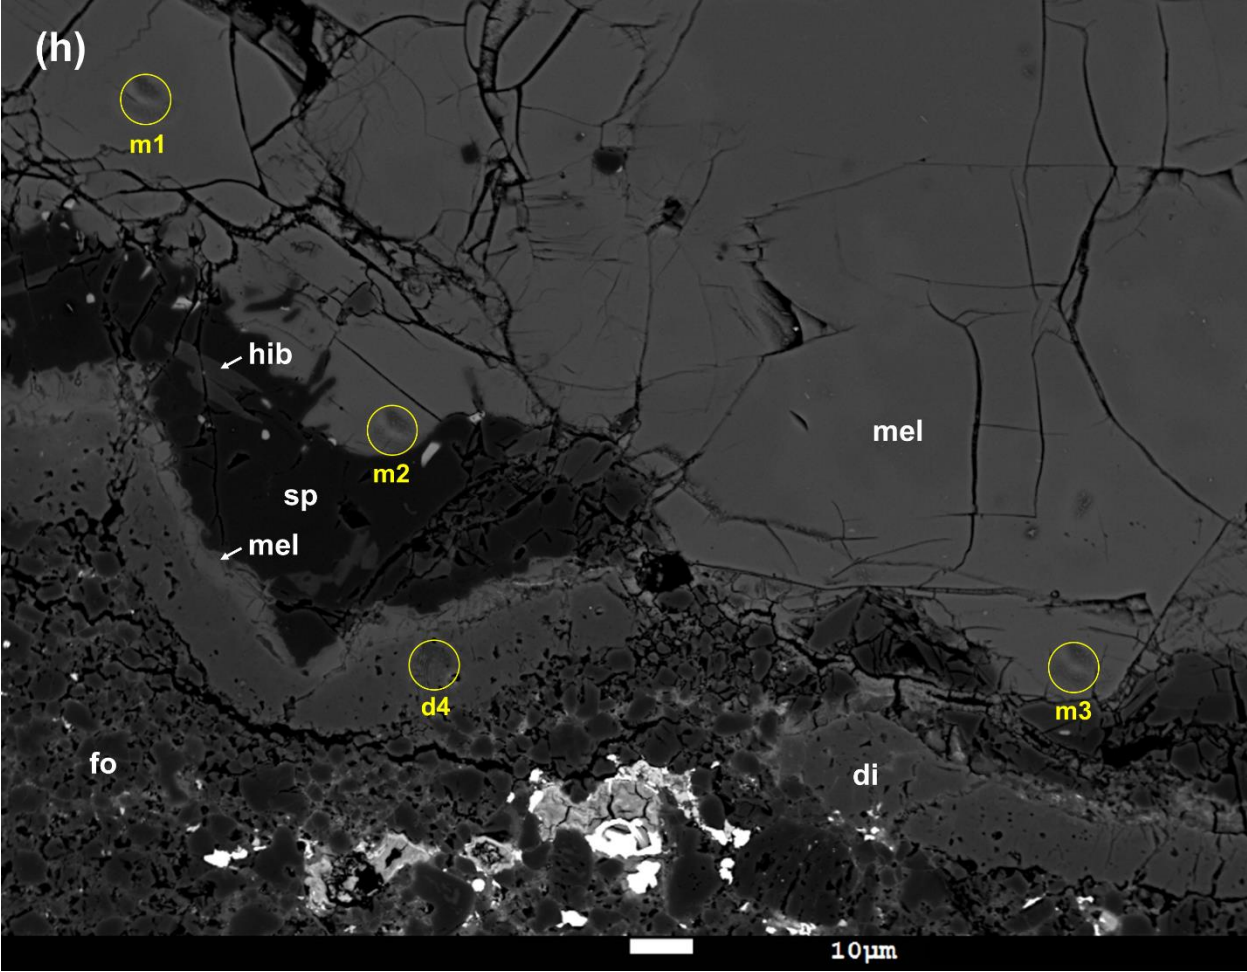

Supplement: NIHMS1065008-supplement-supplemental.pdf [file NIHMS1065008-supplement-supplemental.pdf]
